# Supplementary material for: Non-coding autoimmune risk variant defines role for ICOS in T peripheral helper cell development
Source: PubMed Central journal article supplement (PMC10923805; doi:10.1038/s41467-024-46457-8), 2024-03-09
Supplement: 41467_2024_46457_MOESM1_ESM.pdf [file 41467_2024_46457_MOESM1_ESM.pdf]

## Supplementary Figures

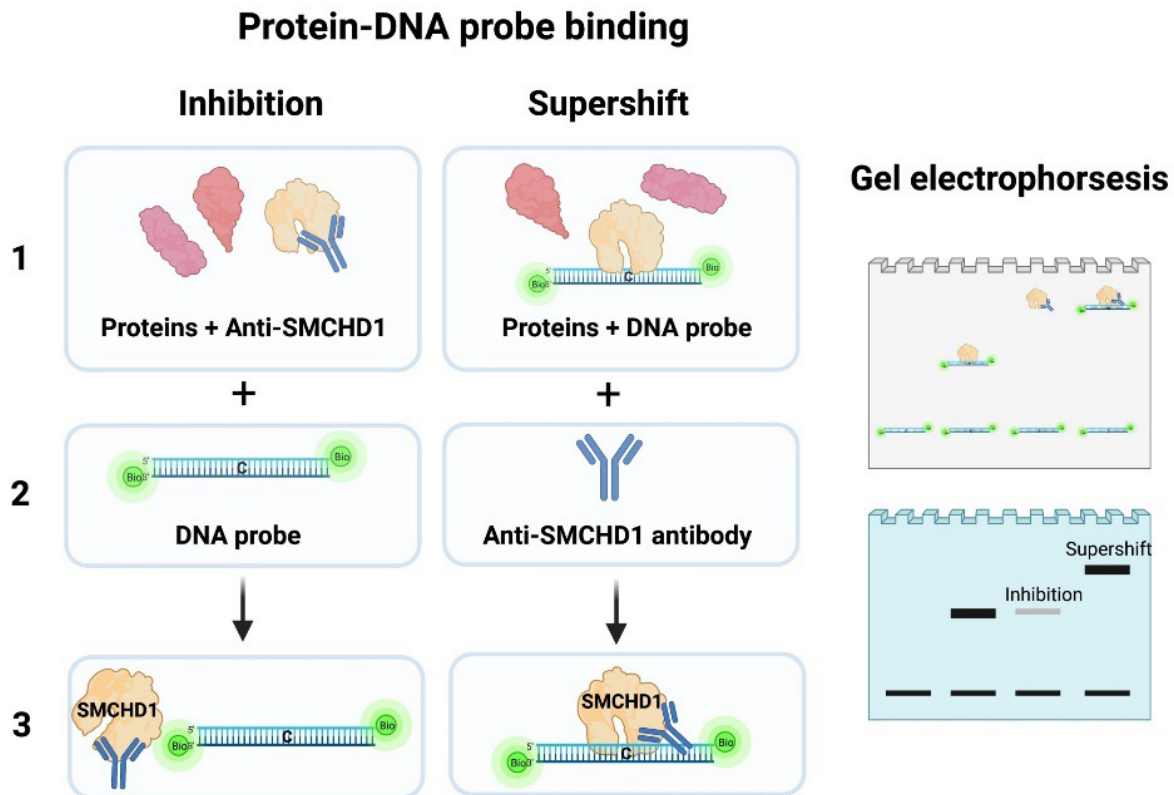

**Supplementary Figure 1. Differential effects of antibodies during EMSA in Figure 1B.** Pre-incubation of anti-SMCHD1 with nuclear extract inhibits DNA probe binding, reducing the amount of SMCHD1-DNA complex observed on the EMSA gel image. Incubation with anti-SMCHD1 after nuclear extract/DNA probe complexes have already been formed results in supershifted complexes of SMCHD1, anti-SMCHD1, and DNA probe. This illustration was created with BioRender.com.

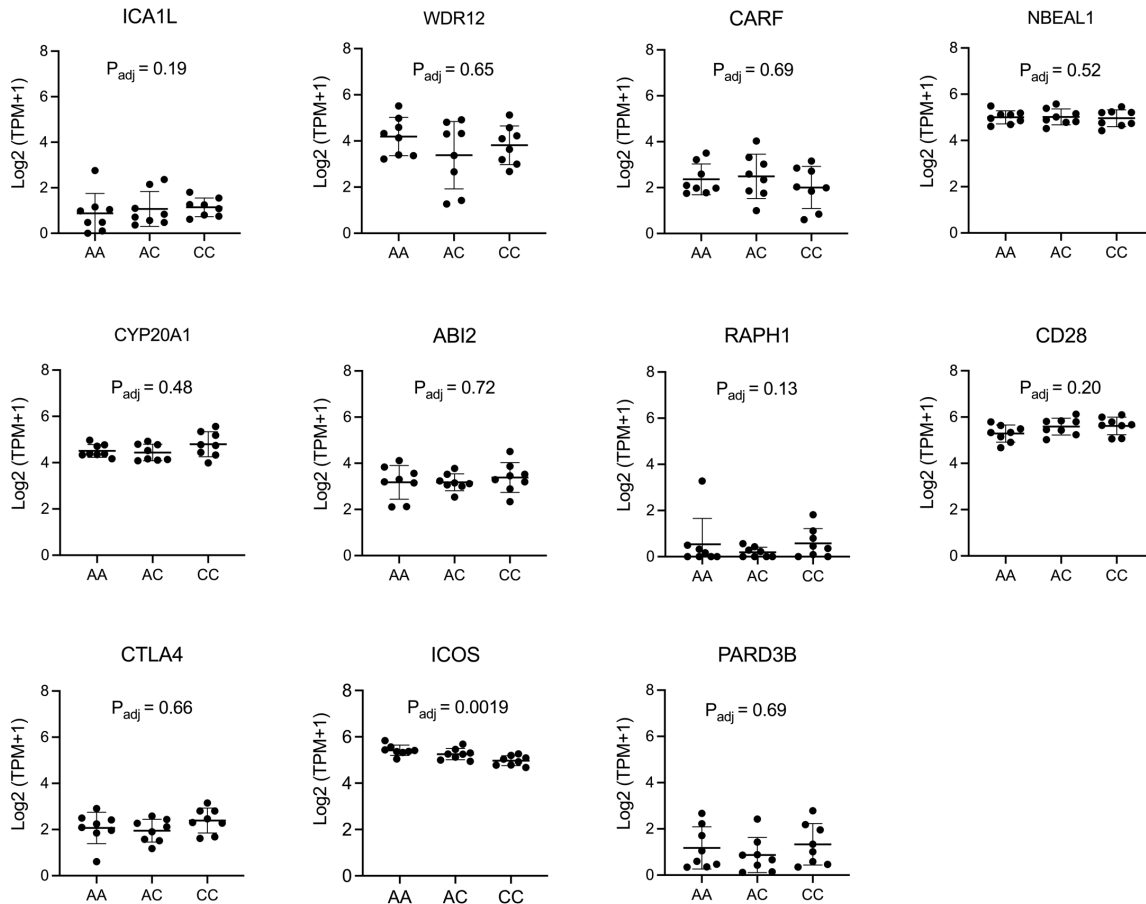

**Supplementary Figure 2. cis-eQTL mapping analysis** was performed using low-input RNA sequencing in resting CD4<sup>+</sup> T cells from 24 healthy donors (8 A/A, 8 A/C, and 8 C/C genotypes at rs117701653). We examined 11 protein coding genes that have a transcription start site (TSS) within a 1 MB window of SNP rs117701653, namely *ICA1L*, *WDR12*, *CARF*, *NBEAL1*, *CYP20A1*, *ABI2*, *RAPH1*, *CD28*, *CTLA4*, *ICOS*, and *PARD3B*. Expression levels were corrected for age and sex and residuals were rank-normal transformed. P values from a linear model implemented in QTLtools were shown. P values were computed using a linear model by QTLtools for association between genotypes and expression levels corrected for multiple comparison, age, sex, and rank-normal transformed residuals.

## A Wild type Jurkat cells

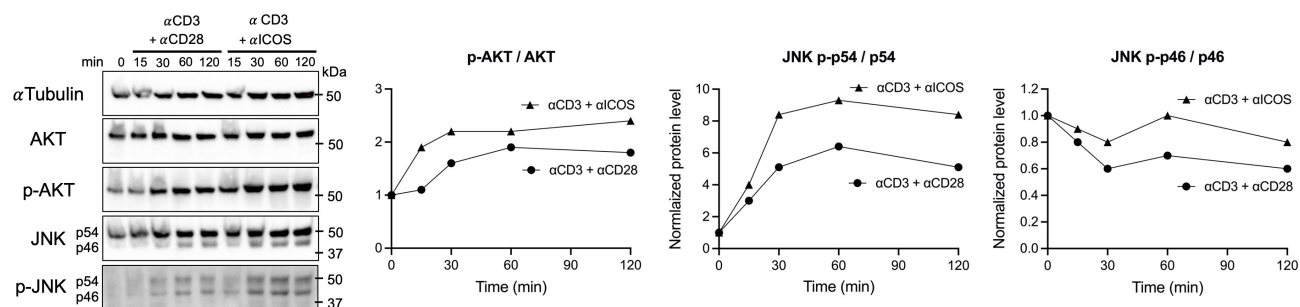

## B Base-edited Jurkat clones

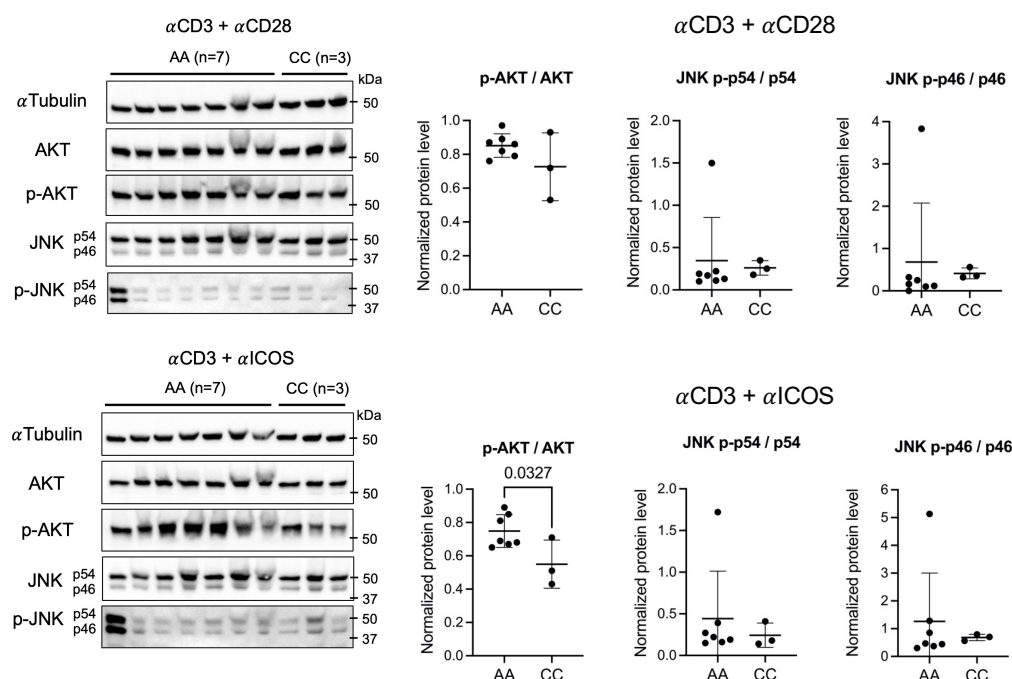

**Supplementary Figure 3. Genotype at s117701653 controls ICOS signaling. (A)** In wild-type Jurkat cells stimulated with either anti-CD3/CD28 or anti-CD3/ICOS antibodies over different time periods, the phosphorylated levels of AKT and JNK were examined once using western blot analysis. Protein expressions were quantified by measuring the band intensity corresponding to  $\alpha$ -Tubulin, AKT, and JNK. The signaling activity was assessed by examining the relative expression of phospho-AKT, phospho-JNK p54 and p46 compared to their total expressions. **(B)** AA (n=7) and CC (n=3) CRISPR-edited Jurkat clones were stimulated with either anti-CD3/CD28 or anti-CD3/ICOS for 30 minutes. Then, the signaling activities as indicated by p-AKT/AKT, JNK p-p54/JNK and JNK p-p46 were tested once to compare between the AA and CC clones. *P* value from unpaired t-test with two-tailed significance. AKT: AKT serine/threonine kinase, JNK: c-Jun N-terminal kinases. Uncropped western blotting blots are included in the Source Data file.

## A SMCHD1 expression

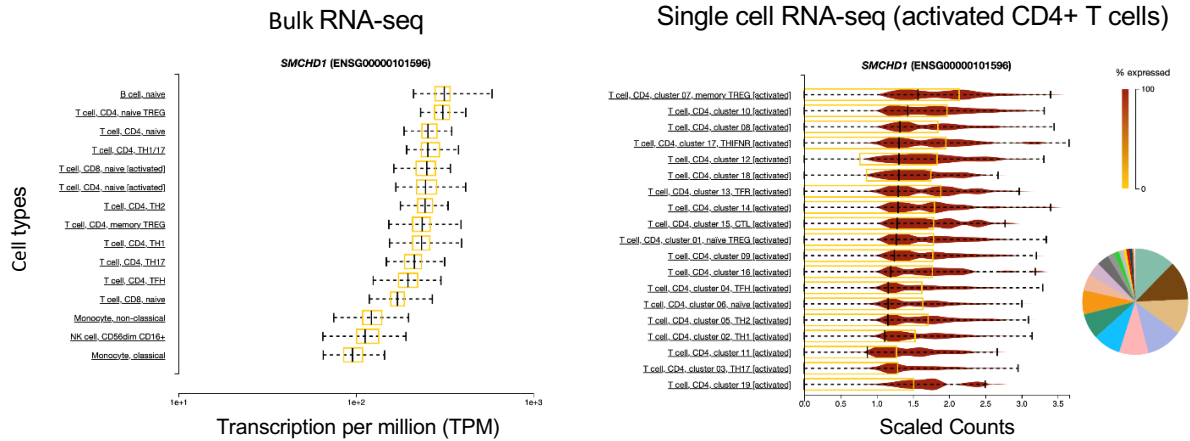

## B ICOS expression

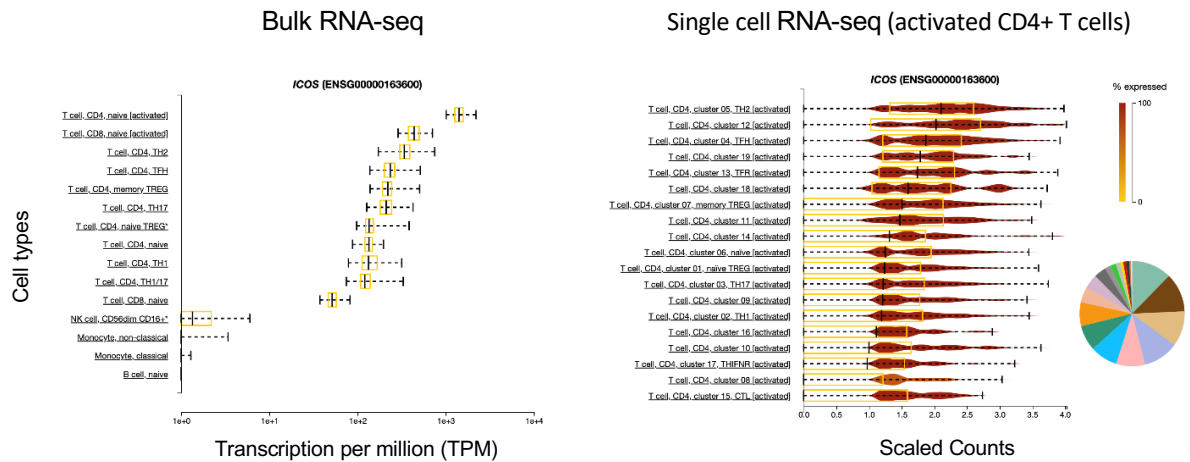

**Supplementary Figure 4. (A) SMCHD1 and (B) ICOS expression by bulk RNA sequencing and single cell RNA sequencing were retrieved from <https://dice-database.org/landing>. Bulk RNA-seq; X-axis represents expression level of depicted genes in transcripts per million (TPM). Boxes indicate 25-75 % interquartile ranges, and whiskers indicate minimum to maximum. Single cell RNA-seq; violin plots display scaled counts of expression levels in each cell cluster. The color scale indicates the fraction of cells that express the depicted genes within each cluster of activated CD4+ T cells. Boxes indicate 25-75 % interquartile ranges, and whiskers indicate minimum to maximum.**

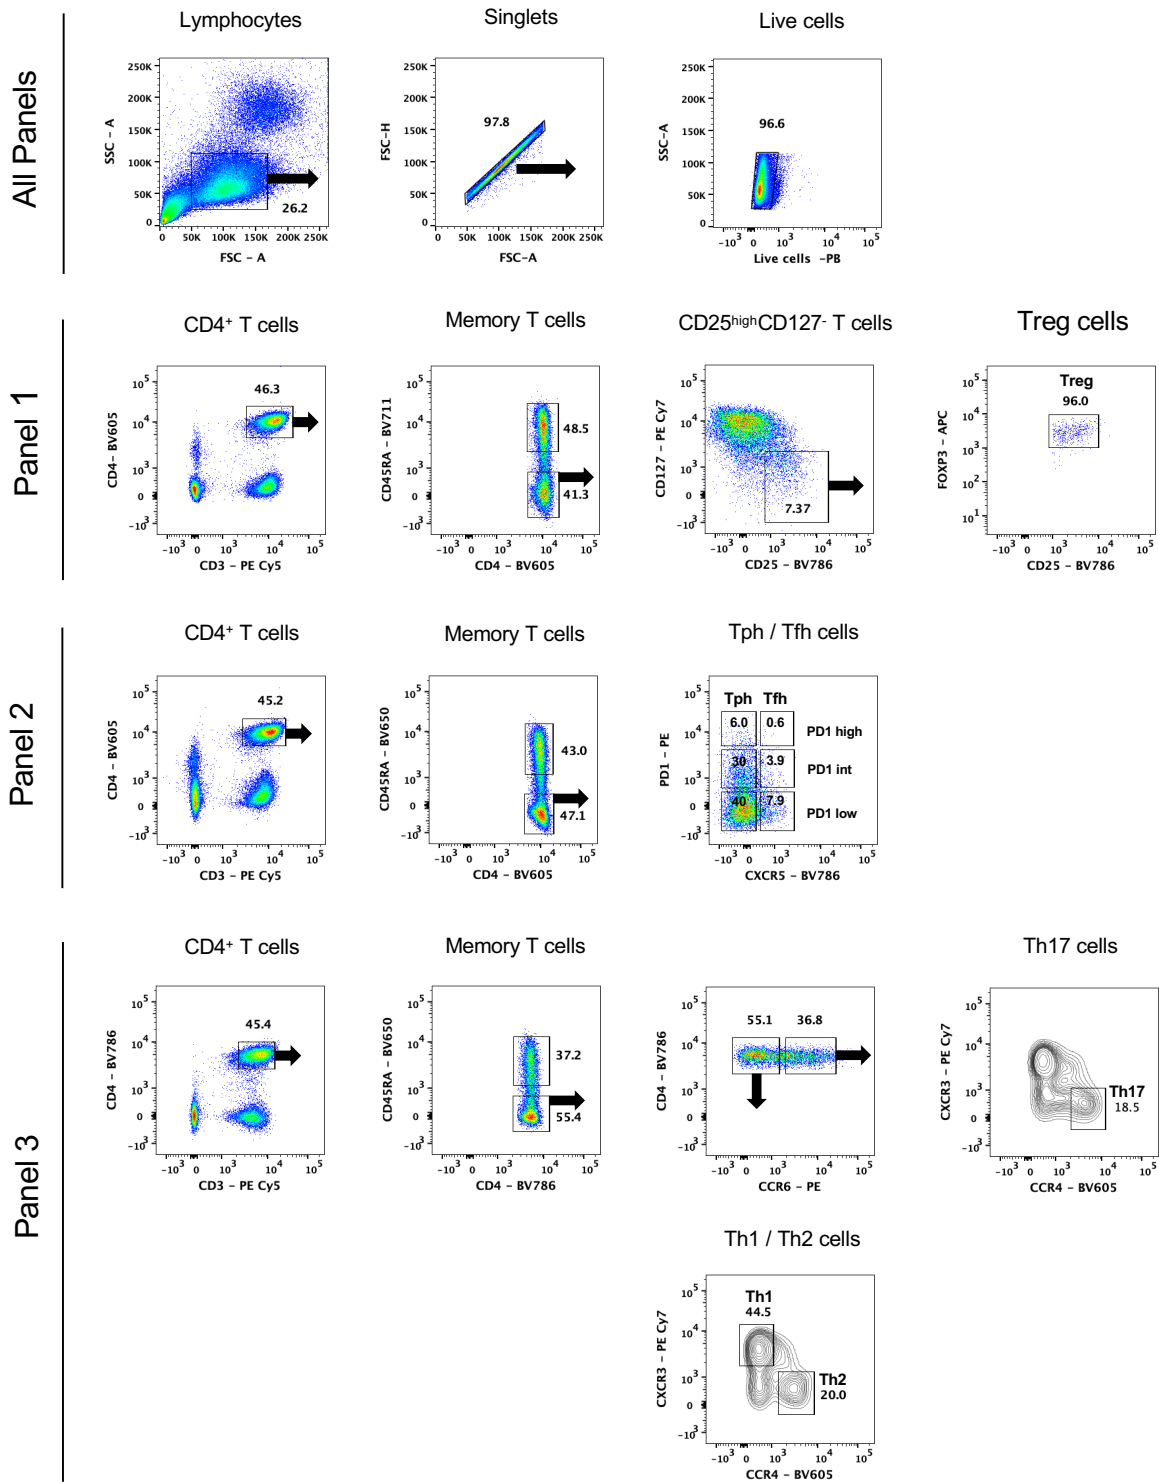

**Supplementary Figure 5.** Gating strategies to identify CD3<sup>+</sup>CD4<sup>+</sup>CD25<sup>high</sup>CD127<sup>-</sup>FOXP3<sup>+</sup> Treg cells (panel 1); CD3<sup>+</sup>CD4<sup>+</sup>CD45RA<sup>-</sup>CXCR5<sup>-</sup>PD-1<sup>high</sup> Tph cells and CD3<sup>+</sup>CD4<sup>+</sup>CD45RA<sup>-</sup>CXCR5<sup>+</sup>PD-1<sup>high</sup> Tfh cells (panel 2); CD3<sup>+</sup>CD4<sup>+</sup>CD45RA<sup>-</sup>CCR6<sup>-</sup>CXCR3<sup>+</sup>CCR4<sup>-</sup> Th1 cells, CD3<sup>+</sup>CD4<sup>+</sup>CD45RA<sup>-</sup>CCR6<sup>-</sup>CXCR3<sup>-</sup>CCR4<sup>+</sup> Th2 cells, and CD3<sup>+</sup>CD4<sup>+</sup>CD45RA<sup>-</sup>CCR6<sup>+</sup>CXCR3<sup>-</sup>CCR4<sup>+</sup> Th17 cells (panel 3).

## ICOS expression by flow cytometry

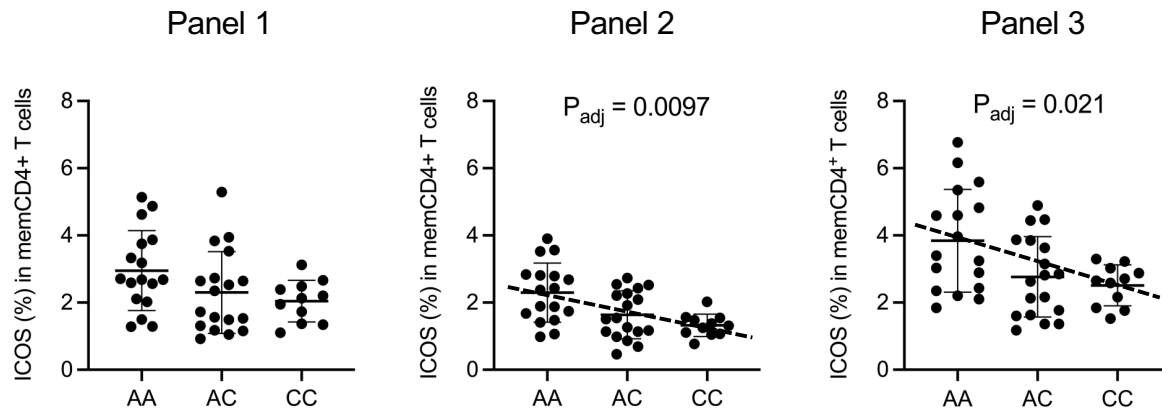

**Supplementary Figure 6. Association of rs117701653 genotype with frequency of ICOS<sup>+</sup> cells among memory CD4<sup>+</sup> T cells.** The frequency of ICOS expression was determined by flow cytometry for 46 healthy subjects with A/A (n = 17), A/C (n = 18), and C/C (n = 11) genotype at SNP rs117701653 by flow cytometry analysis, as per antibody panels depicted in Figure S5. Error bars are represented by Mean  $\pm$  S.D. *P* values were determined using a linear regression model adjusted for age and sex.

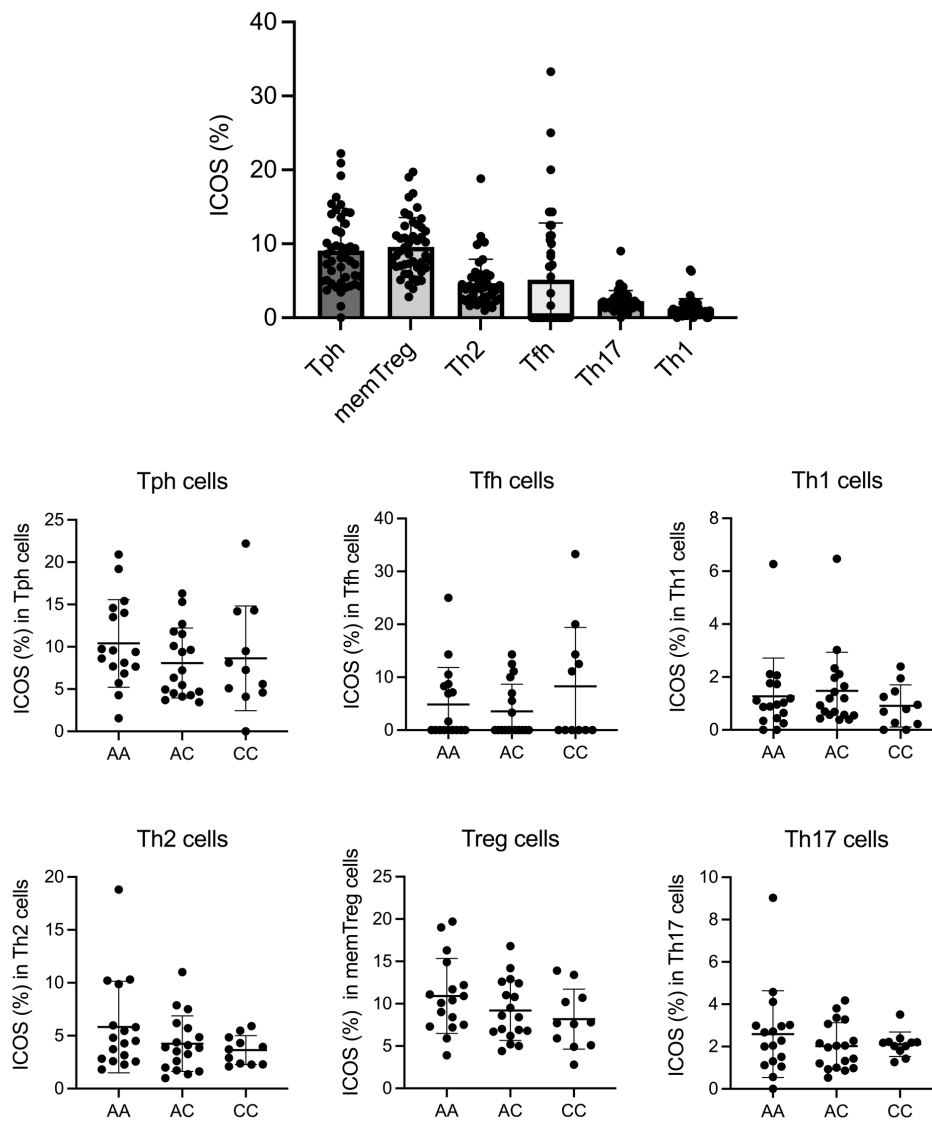

**Supplementary Figure 7. Frequency of CD4<sup>+</sup> T cell subsets (Tph, memory Treg, Th2, Tfh, Th17, Th1) that express ICOS was determined by flow cytometry for healthy subjects bearing A/A (n = 17), A/C (n = 18), and C/C (n = 11) genotype at SNP rs117701653.**

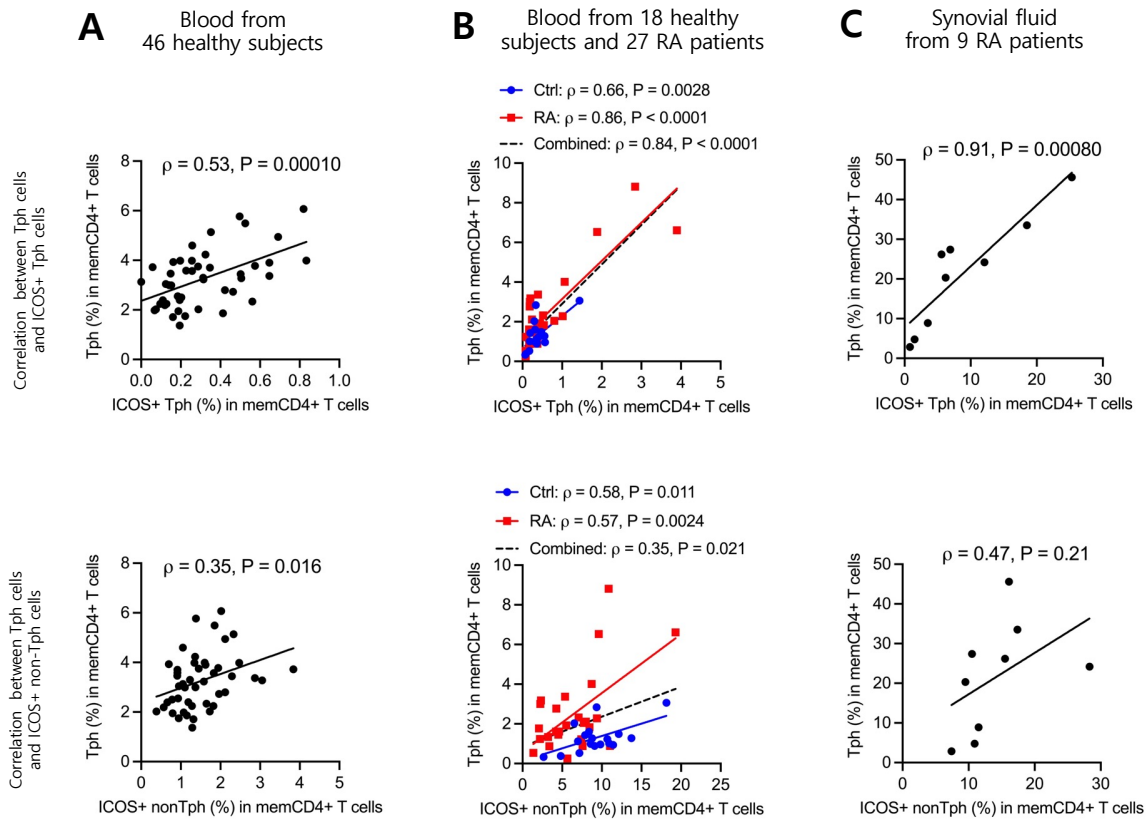

**Supplementary Figure 8. Frequency of ICOS<sup>+</sup> Tph or ICOS<sup>+</sup> non-Tph cells in memory CD4<sup>+</sup> T cells correlates with frequency of Tph cells in memory CD4<sup>+</sup> T cells.** The proportion of subsets depicted was determined by (A) flow cytometry with PBMCs from 46 healthy subjects, (B) mass cytometry with PBMCs from 18 healthy controls (colored in blue) and 27 RA patients (colored in red), and (C) flow cytometry with synovial fluid from 9 RA patients. Pearson correlation coefficients and *p* values with a two-tailed test were used to measure linear correlations.



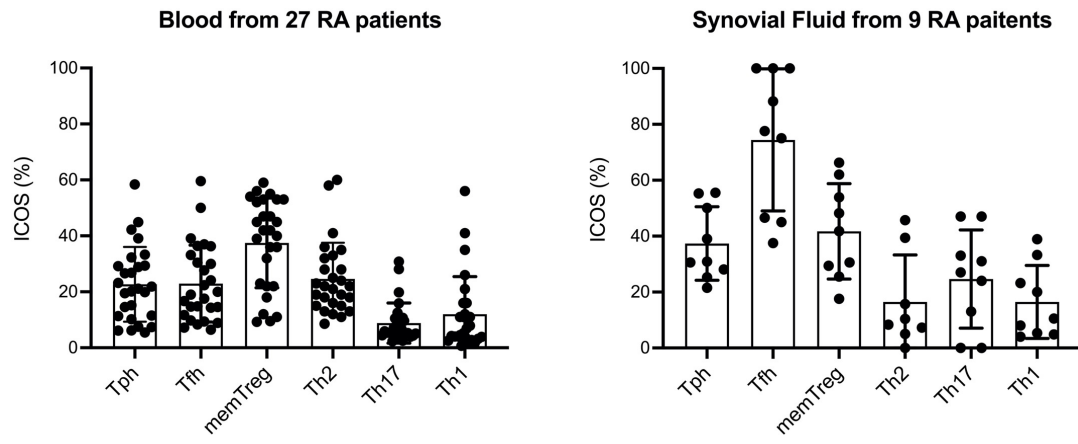

**Supplementary Figure 9. Frequency of ICOS+ cells within CD4+ T cell subpopulations in RA (Tph, Tfh, memory Treg, Th2, Th17, and Th1) in blood from 27 patients and synovial fluid from 9 patients.**

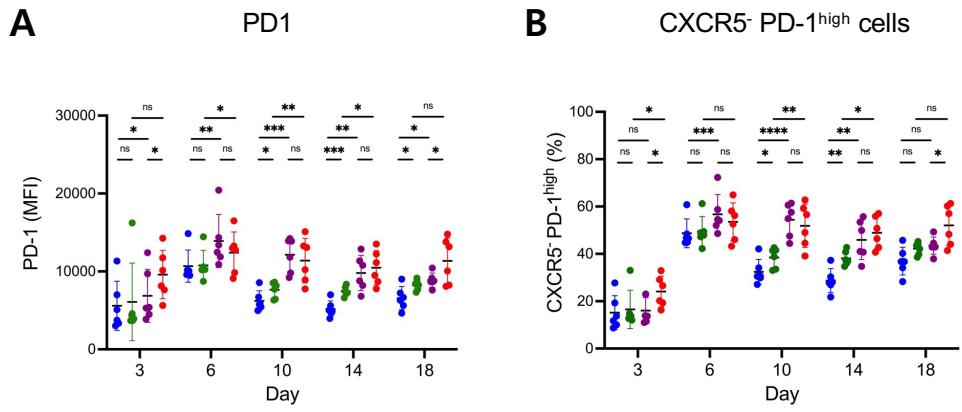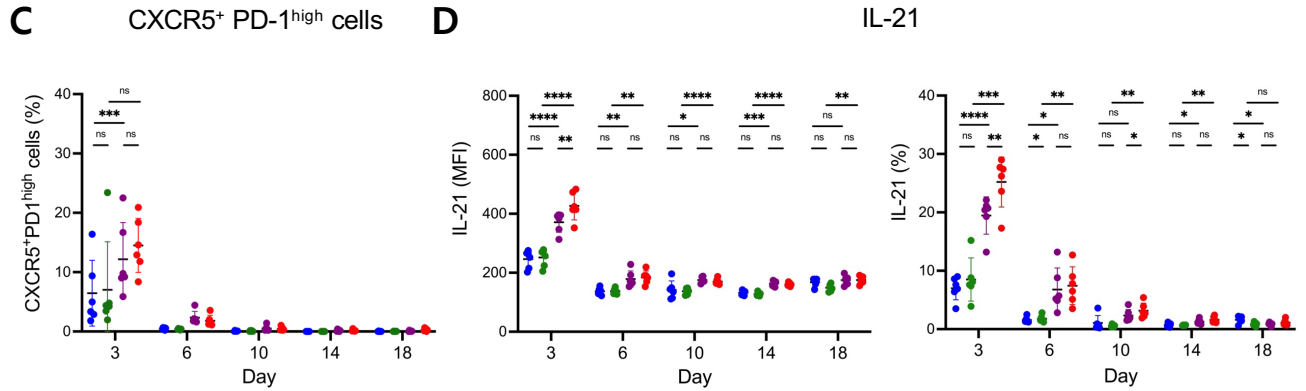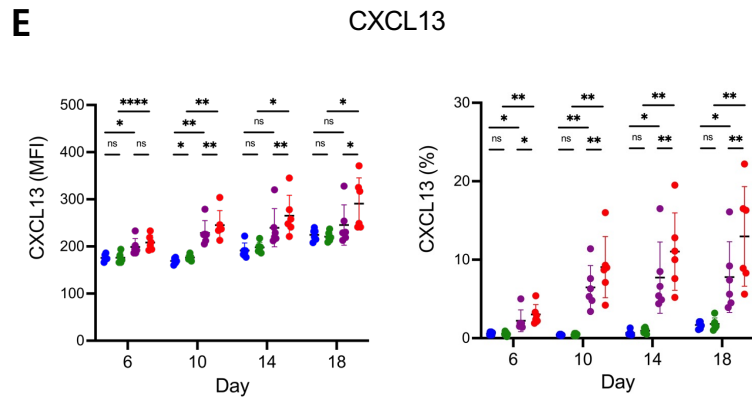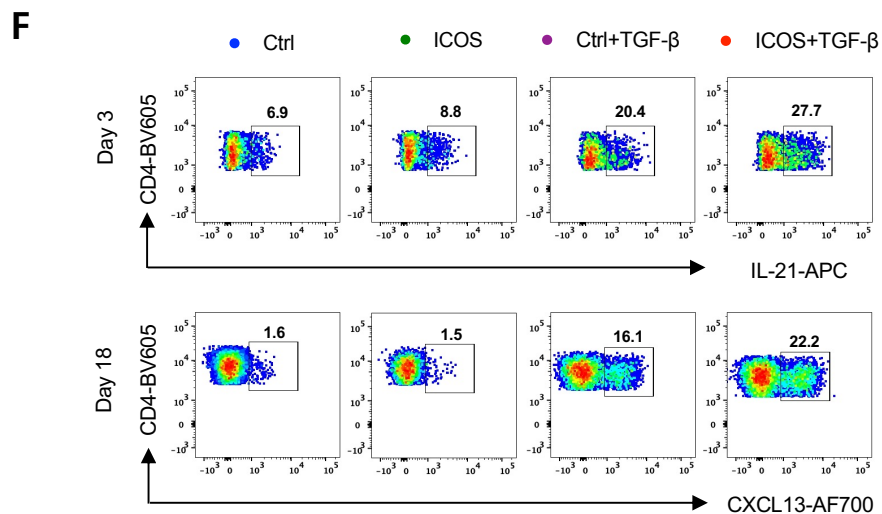

**Supplementary Figure 10. ICOS stimulation accelerates the development of TGF- $\beta$ -induced CXCR5-PD-1<sup>high</sup> Tph-like cells expressing IL-21 and CXCL13.** Human memory CD4<sup>+</sup> T cells from 6 healthy subjects were differentiated with anti-CD3/CD28 stimulation in the indicated combination of TGF- $\beta$  and anti-ICOS stimulation for varying period. Control (Blue), ICOS (Green), TGF- $\beta$  (Purple), TGF- $\beta$ +ICOS (Red) stimulation groups were evaluated in time course. **(A)** MFI of PD-1 in whole population. **(B)** Frequency of CXCR5<sup>-</sup> PD-1<sup>high</sup> cells. **(C)** Frequency of CXCR5<sup>+</sup> PD-1<sup>high</sup> cells. MFI of **(D)** IL-21 and **(E)** CXCL13 in whole population. **(F)** Representative dot plots of IL-21 and CXCL13. MFI, mean fluorescence intensity. Error bars are expressed as mean  $\pm$  S.D. \* $P$  < 0.05, \*\* $P$  < 0.01, \*\*\* $P$  < 0.001, \*\*\*\* $P$  < 0.0001.  $P$  values were determined using one-way ANOVA followed by uncorrected Fisher's LSD test. Exact  $P$  values were provided in the Source Data.

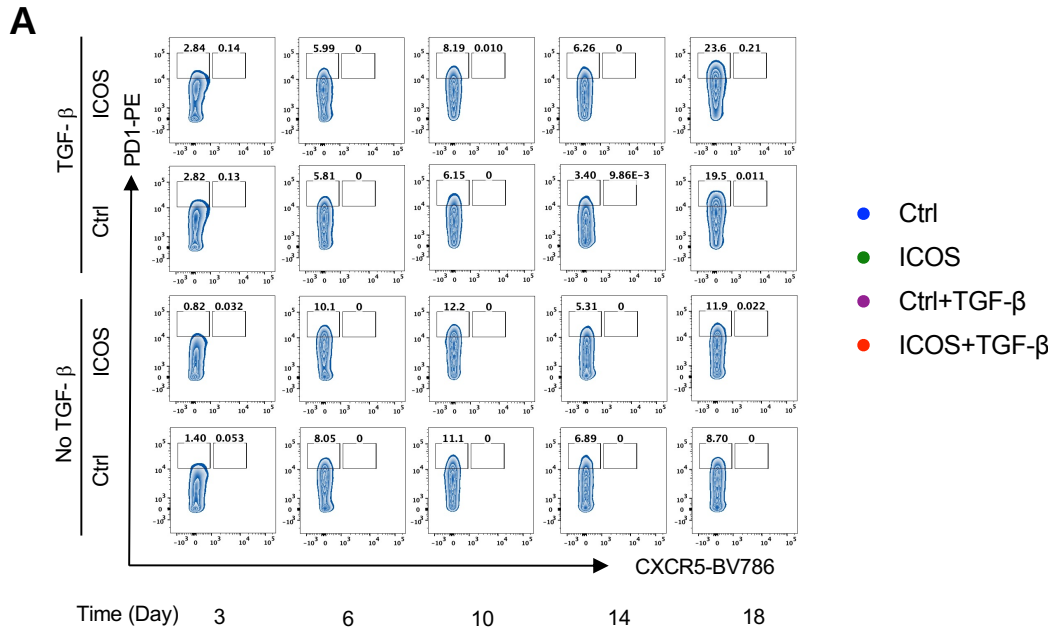

**B** CXCR5<sup>+</sup> PD-1<sup>high</sup> cells

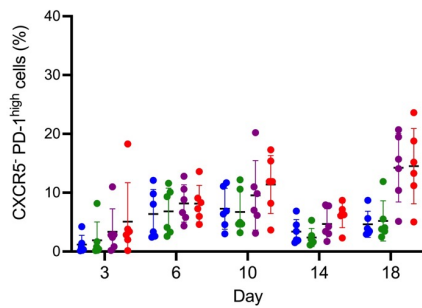

**C** IL-21

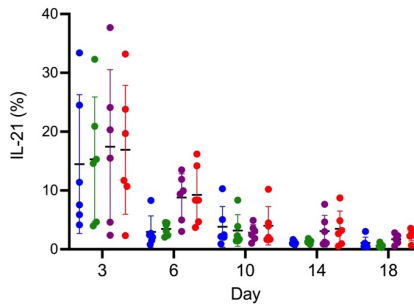

**D** CXCL13

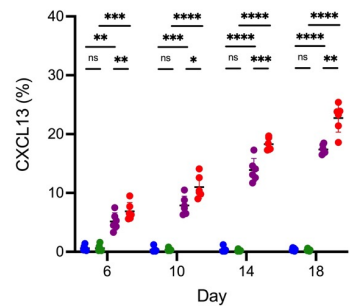

**E** Legend: ● Ctrl (blue), ● ICOS (green), ● Ctrl+TGF-β (purple), ● ICOS+TGF-β (red)

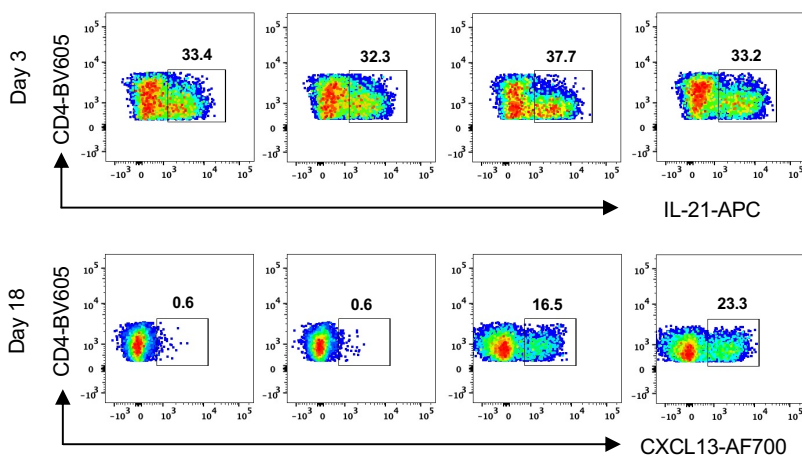

**Supplementary Figure 11. Naive CD4<sup>+</sup> T cells differentiating into CXCR5<sup>+</sup>PD-1<sup>high</sup> Tph-like cells was not influenced by ICOS stimulation.** Human naive CD4<sup>+</sup> T cells from 6 healthy donors were differentiated with anti-CD3/CD28 stimulation in the indicated combination of TGF- $\beta$  and anti-ICOS stimulation for different period. Control (Blue), ICOS (Green), TGF- $\beta$  (Purple), TGF- $\beta$ +ICOS (Red) stimulation groups were evaluated. **(A)** Representative dot plots by flow cytometry of CXCR5 and PD-1 to gate CXCR5<sup>+</sup>PD-1<sup>high</sup> Tph-like cells and CXCR5<sup>+</sup>PD-1<sup>high</sup> Tfh-like cells. **(B)** Frequency of CXCR5<sup>-</sup>PD-1<sup>high</sup> cells. Frequency of **(C)** IL-21 and **(D)** CXCL13 in whole population. **(E)** Representative dot plots of IL-21 and CXCL13. Error bars are expressed as mean  $\pm$  S.D. \* $P$  < 0.05, \*\* $P$  < 0.01, \*\*\* $P$  < 0.001, \*\*\*\* $P$  < 0.0001.  $P$  values were determined using one-way ANOVA followed by uncorrected Fisher's LSD test. Exact  $P$  values were provided in the Source Data.

After 18 days of differentiation

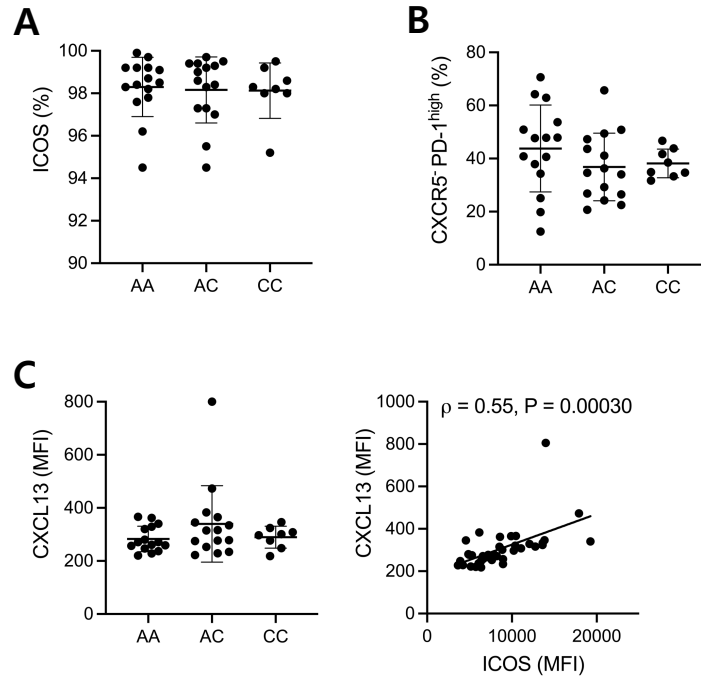

**Supplementary Figure 12. Genotype at rs117701653 does not correlate with differentiation of CXCR5-PD-1<sup>high</sup> Tph-like CD4<sup>+</sup> T cells at day 18.** Memory CD4<sup>+</sup> T cells from 38 healthy donors with A/A (n = 15), A/C (n = 15), C/C (n = 8) genotype at rs117701653 SNP were differentiated using anti-CD3/CD28 bead and anti-ICOS antibody in the presence of TGF- $\beta$ . After 18 days of differentiation, (A) frequency of ICOS<sup>+</sup> cells, (B) frequency of CXCR5-PD-1<sup>high</sup> cells, (C) MFI of CXCL13 and correlation between MFI of ICOS and CXCL13 across whole individuals were displayed. MFI, mean fluorescence intensity. Error bars are expressed as mean  $\pm$  S.D. Pearson correlation statistics with a two-tailed test (C).

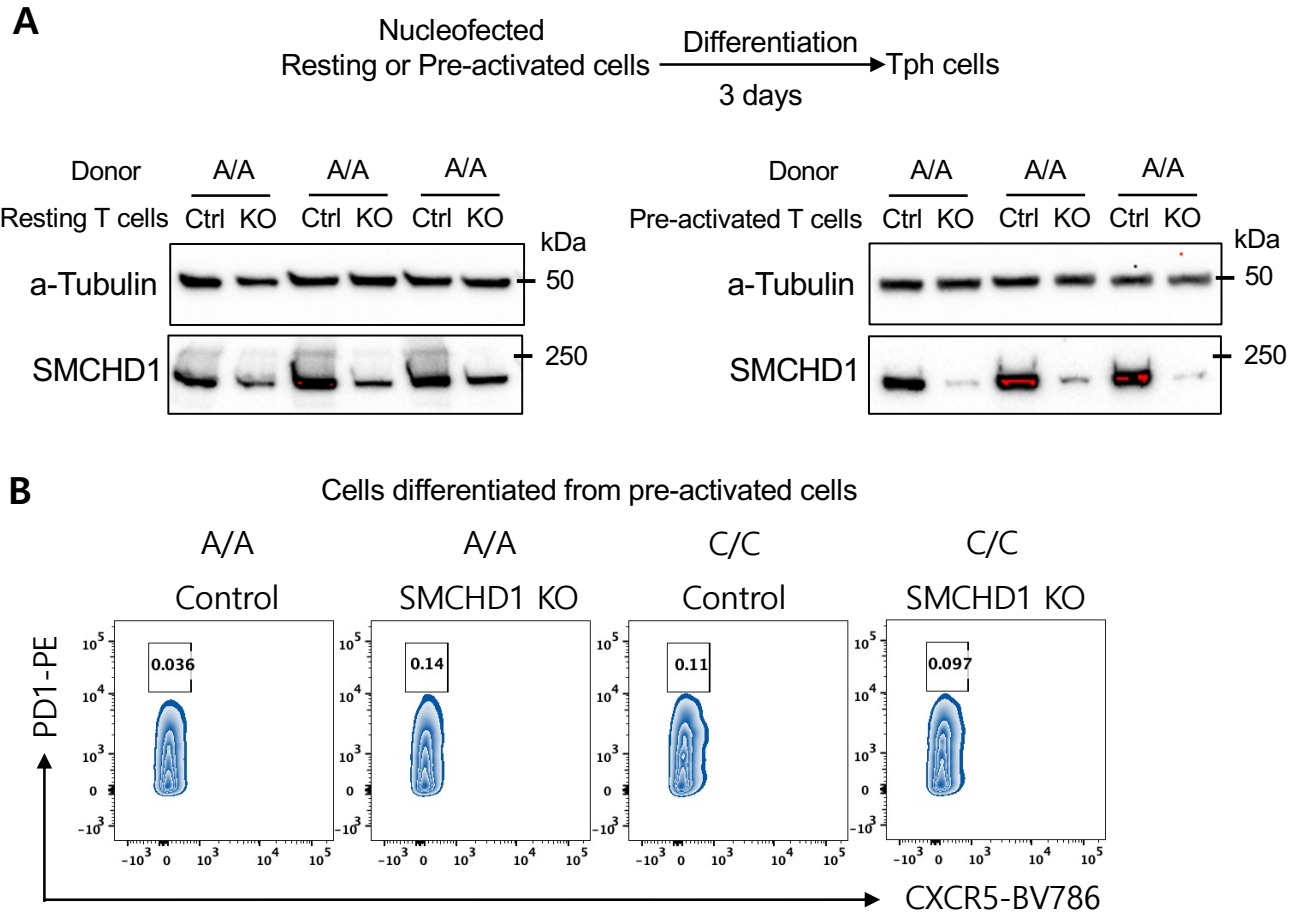

**Supplementary Figure 13. SMCHD1 deletion using CRISPR-Cas9 was optimized in memory CD4<sup>+</sup> T cells isolated from 5 healthy individuals. (A)** Resting cells or cells preactivated with anti-CD3/CD28 for 2 days were nucleofected with Cas9 protein and either a negative control or SMCHD1-targeting sgRNA. Following this, the resting and preactivated cells were stimulated using anti-CD3/CD28, anti-ICOS, and TGF- $\beta$  for 3 days. The efficiency of SMCHD1 deletion was assessed by western blot, which demonstrated the successful removal of over 90% of SMCHD1 in the cells differentiated from the preactivated cells. The SMCHD1 deletion was successfully confirmed three times with independent biological samples, including Figure 6G. **(B)** Flow cytometry gating of CXCR5- PD-1<sup>high</sup> cells revealed that the preactivation condition resulted in a lack of high expression of PD-1. Uncropped western blotting blots are included in the Source Data file.

## Supplementary Tables

**Supplementary Table 1. Mass spectrometry of rs117701653-bound proteins by FREP**

| Protein ID | Molecular weight | Bio-rs1177 | Bio-rs1177 + Competitor | Bio-Ctrl |
|------------|------------------|------------|-------------------------|----------|
| ALB        | 69 kDa           | 14         | 26                      | 23       |
| PARP1      | 113 kDa          | 14         | 17                      | 26       |
| DST        | 861 kDa          | 3          | 1                       | 6        |
| RYR1       | 565 kDa          | 3          | 1                       | 2        |
| H3BNH8     | 10 kDa           | 3          | 0                       | 0        |
| ACACB      | 277 kDa          | 3          | 0                       | 1        |
| SMCHD1     | 226 kDa          | 3          | 0                       | 0        |
| SYNE1      | 1011 kDa         | 2          | 0                       | 5        |
| DYNC1H1    | 532 kDa          | 2          | 1                       | 3        |
| GOLGB1     | 376 kDa          | 2          | 0                       | 4        |
| SF3B1      | 146 kDa          | 2          | 0                       | 3        |
| TOP1       | 91 kDa           | 1          | 3                       | 1        |
| SMG1       | 410 kDa          | 1          | 0                       | 4        |
| ROCK1      | 158 kDa          | 1          | 0                       | 3        |
| SPEN       | 402 kDa          | 1          | 0                       | 3        |
| IFI16      | 88 kDa           | 0          | 9                       | 0        |
| NONO       | 54 kDa           | 0          | 9                       | 0        |
| SFPQ       | 76 kDa           | 0          | 7                       | 0        |
| ACTB       | 42 kDa           | 0          | 6                       | 0        |
| DDX5       | 69 kDa           | 0          | 4                       | 0        |
| HNRNPM     | 78 kDa           | 0          | 4                       | 2        |
| PUF60      | 60 kDa           | 0          | 5                       | 1        |
| MYO7A      | 254 kDa          | 0          | 0                       | 3        |
| YBX1       | 36 kDa           | 0          | 4                       | 0        |
| HNRNPA1    | 39 kDa           | 0          | 3                       | 1        |
| SRRM2      | 300 kDa          | 0          | 1                       | 3        |
| KIAA1107   | 156 kDa          | 0          | 0                       | 3        |
| ASH1L      | 333 kDa          | 0          | 0                       | 3        |
| CPSF6      | 59 kDa           | 0          | 4                       | 0        |
| EFCAB6     | 173 kDa          | 0          | 0                       | 3        |
| SECISBP2L  | 122 kDa          | 0          | 0                       | 3        |
| SRSF1      | 28 kDa           | 0          | 3                       | 0        |
| MIS188P1   | 129 kDa          | 0          | 0                       | 3        |
| MACF1      | 838 kDa          | 0          | 0                       | 3        |



**Supplementary Table 2. Hardy-Weinberg Equilibrium test for rs117701653 from gnomAD (v3.1.2).**

| Population                   | Observed genotype distribution |       |     | Expected genotype distribution |         |       | Chi-square |         |
|------------------------------|--------------------------------|-------|-----|--------------------------------|---------|-------|------------|---------|
|                              | AA                             | AC    | CC  | AA                             | AC      | CC    | $\chi^2$   | p value |
| European (non-Finnish)       | 30,833                         | 3,092 | 86  | 30,825.3                       | 3,107.4 | 78.3  | 0.83       | 0.66    |
| African/<br>African American | 20,186                         | 516   | 6   | 20,183.4                       | 521.3   | 3.4   | 2.12       | 0.35    |
| Latino/<br>Admixed American  | 6,421                          | 1,157 | 53  | 6,420.3                        | 1,158.5 | 52.3  | 0.01       | 0.99    |
| European (Finnish)           | 4,627                          | 650   | 25  | 4,625.1                        | 653.8   | 23.1  | 0.18       | 0.91    |
| East Asian                   | 1,963                          | 598   | 39  | 1,967.9                        | 588.1   | 43.9  | 0.73       | 0.69    |
| South Asian                  | 1,484                          | 824   | 103 | 1,491.0                        | 810.0   | 110.0 | 0.72       | 0.70    |
| Ashkenazi Jewish             | 1,322                          | 386   | 27  | 1,322.9                        | 384.2   | 27.9  | 0.04       | 0.98    |
| Other                        | 904                            | 132   | 9   | 900.4                          | 139.2   | 5.4   | 2.82       | 0.24    |
| Amish                        | 453                            | 3     | 0   | 453.0                          | 3.0     | 0.0   | 0.00       | 1.00    |
| Middle Eastern               | 125                            | 29    | 4   | 123.2                          | 32.7    | 2.2   | 1.99       | 0.37    |

**Supplementary Table 3. Oligonucleotide sequences used for EMSA, qPCR, and CRISPR-Cas9**

| EMSA DNA fragment    | Sequence                                                                             |
|----------------------|--------------------------------------------------------------------------------------|
| rs117701653-C/5Biosg | AATGATACGGCGACCACCGAGGATCCGGTGTGTGCTTGGGCGGATATGAGTGCACG_GAATTCTCGTATGCCGTCTTCTGCTTG |
| rs117701653-C        | AATGATACGGCGACCACCGAGGATCCGGTGTGTGCTTGGGCGGATATGAGTGCACGGAATTCTCGTATGCCGTCTTCTGCTTG  |
| Irrelevant DNA       | AATGATACGGCGACCACCGAGGATCCAGGGCTGTAGATTCCGGCCTGAAGCCTGGG_GAATTCTCGTATGCCGTCTTCTGCTTG |

| ChIP-qPCR Primers   | Sequence             |
|---------------------|----------------------|
| HS17 Forward        | CAAGGTCCATTACGCCACT  |
| HS17 Reverse        | AGGGTTTGTCCCAGGTACT  |
| rs117701653 Forward | AGAAGGGGAGGAAGGTGTGT |
| rs117701653 Reverse | AGGGTATGCAAATGTTCCAG |

| rs117701653 editing by CRISPR-Cas9 | Sequence                                                                                                                 |
|------------------------------------|--------------------------------------------------------------------------------------------------------------------------|
| sgRNA                              | AGGAAGGUGUGUCUUUGGGAGG                                                                                                   |
| DNA Donor Template                 | ACTCACGTCTTATTTAGGGTATGCAAATGTTCCAGTACACTCTCAAAGTGACAGATGTAAGTCTCTATGTGTGCACTCATATCCGCCAAAGCACACACCTTCTCCCTTCTCTCGAATGTT |

| SMCHD1 KO by CRISPR-Cas9 | Sequence                |
|--------------------------|-------------------------|
| sgRNA                    | UACUGCUGUGGUUAUCACAGGGG |

| qPCR primer                      | Sequence                                         | PrimerBank ID |
|----------------------------------|--------------------------------------------------|---------------|
| $\beta$ -Actin-Forward / Reverse | CATGTACGTTGCTATCCAGGC / CTCCTAATGTCACGCACGAT     | 4501885a1     |
| SMCHD1-Forward / Reverse         | GCCACAGGACGGTGTACTTG / CCGACTGTAGCAGGTATAAGGTG   | 148839304c1   |
| ICOS-Forward / Reverse           | CAGGAGAAATCAATGTTCTGCC / CCTTTTGTCTTAGTGAGATCGCA | 251823951c1   |
| CD28-Forward / Reverse           | CTATTTCCCGGACCTTCTAAGCC / GCGGGGAGTCATGTTTCATGTA | 340545509c1   |
| RAPH1-Forward / Reverse          | CCAACCTTTTCTACCGCTTCTCC / ACTGTTTCTGAACCAATGCTG  | 47132518c1    |

## Supplementary Table 4. Lists of antibodies used in this study

### T cell stimulation

| Antigen | Supplier   | Source | Clone  | Catalog. No | Dilution | Application note by the manufacturer                                                                    |
|---------|------------|--------|--------|-------------|----------|---------------------------------------------------------------------------------------------------------|
| CD3     | Biologend  | Mouse  | OKT3   | 317302      | 5 µg/ml  | The OKT3 monoclonal antibody reacts with an epitope on the epsilon-subunit within the human CD3 complex |
| CD28    | Biologend  | Mouse  | CD28.2 | 302943      | 2 µg/ml  | T cell costimulation                                                                                    |
| ICOS    | Invitrogen | Mouse  | ISA-3  | 16-9948-82  | 2 µg/ml  | T cell activation                                                                                       |

### Western blotting

| Antigen                   | Supplier   | Source | Catalog. No | Dilution | Western blotting validation by the manufacturer                   |
|---------------------------|------------|--------|-------------|----------|-------------------------------------------------------------------|
| SMCHD1                    | ABCAM      | Rabbit | ab179456    | 1:1000   | 293T, HepG2, HeLa, U-87 MG cell                                   |
| alpha-Tubulin             | Cellsignal | Rabbit | 2144S       | 1:2000   | CAD and C6 cell                                                   |
| ICOS                      | ABCAM      | Rabbit | ab175401    | 1:1000   | Jurkat and mouse thymus                                           |
| RAPH1                     | Cellsignal | Rabbit | 91138T      | 1:1000   | MDA-MB-231, 293 293T, MCF7, HaCAT cell                            |
| CD28                      | Cellsignal | Rabbit | 38774S      | 1:1000   | RPMP1 8226, Jurkat, human and mouse CD4+ T, RL-7, THP-1, EL4 cell |
| AKT                       | Cellsignal | Rabbit | 9272S       | 1:1000   | CHO, HeLa, NIH/3T3 cell                                           |
| Ser473 Phospho-AKT        | Cellsignal | Rabbit | 4060S       | 1:1000   | PC3, NIH/3T3 cell                                                 |
| JNK                       | Cellsignal | Rabbit | 9252S       | 1:1000   | 293, SK-N-MC cell                                                 |
| Thr183/Tyr185 Phospho-JNK | Cellsignal | Rabbit | 4668S       | 1:1000   | 293, NIH/3T3, C6                                                  |

### Immunophenotyping of CD4+ T cells subpopulations

| Antigen | Conjugate | Clone    | Source      | Supplier   | Catalog. No | Dilution | Flow cytometry validation by the manufacturer |
|---------|-----------|----------|-------------|------------|-------------|----------|-----------------------------------------------|
| CD3     | PE-Cy5    | HIT3a    | Mouse       | Biologend  | 300310      | 1:100    | Human PBMC                                    |
| CD4     | BV605     | OKT4     | Mouse       | Biologend  | 317438      | 1:100    | Human PBMC                                    |
| CD4     | BV786     | OKT4     | Mouse       | Biologend  | 317441      | 1:100    | Human PBMC                                    |
| CD25    | BV786     | BC96     | Mouse       | Biologend  | 302638      | 1:100    | Human PBMC                                    |
| CD127   | PE-Cy7    | eBioRDR5 | Mouse       | Invitrogen | 25-1278-42  | 1:100    | Human PBMC                                    |
| CD28    | BV650     | CD28.2   | Mouse       | Biologend  | 302945      | 1:100    | Human PBMC                                    |
| CD45RA  | BV711     | HI100    | Mouse       | Biologend  | 304137      | 1:100    | Human PBMC                                    |
| CD45RA  | BV650     | HI100    | Mouse       | Biologend  | 304135      | 1:100    | Human PBMC                                    |
| CCR4    | BV605     | L291H4   | Mouse       | Biologend  | 359417      | 1:100    | Human PBMC                                    |
| CCR6    | PE        | G034E3   | Mouse       | Biologend  | 353409      | 1:100    | Human PBMC                                    |
| PD1     | PE        | EH12.2H7 | Mouse       | Biologend  | 329905      | 1:100    | Human PBMC                                    |
| CXCR5   | BV786     | J252D4   | Mouse       | Biologend  | 356935      | 1:100    | Human PBMC                                    |
| CXCR3   | PE-Cy7    | G025H7   | Mouse       | Biologend  | 353719      | 1:100    | Human PBMC                                    |
| ICOS    | APC/Cy7   | C398.4A  | henian Hams | Biologend  | 313529      | 1:100    | Human PBMC                                    |
| FOXP3   | APC       | PCH101   | Rat         | Invitrogen | 17-4776-42  | 1:100    | Human PBMC                                    |

| Antigen         | Conjugate | Clone      | Source           | Supplier   | Catalog. No | Dilution |
|-----------------|-----------|------------|------------------|------------|-------------|----------|
| Isotype Control | PE-Cy5    | MOPC-173   | Mouse            | Biologend  | 400217      | 1:100    |
| Isotype Control | BV605     | MPC-11     | Mouse            | Biologend  | 400349      | 1:100    |
| Isotype Control | BV786     | MPC-11     | Mouse            | Biologend  | 400355      | 1:100    |
| Isotype Control | BV786     | MOPC-21    | Mouse            | Biologend  | 400169      | 1:100    |
| Isotype Control | PE-Cy7    | MOPC-21    | Mouse            | Biologend  | 400126      | 1:100    |
| Isotype Control | BV650     | MOPC-21    | Mouse            | Biologend  | 400163      | 1:100    |
| Isotype Control | BV711     | MOPC-21    | Mouse            | Biologend  | 400167      | 1:100    |
| Isotype Control | BV650     | MPC-11     | Mouse            | Biologend  | 400351      | 1:100    |
| Isotype Control | BV605     | MOPC-21    | Mouse            | Biologend  | 400161      | 1:100    |
| Isotype Control | PE        | eBMG2b     | Mouse            | Invitrogen | 12-4732-81  | 1:100    |
| Isotype Control | PE        | P3.6.2.8.1 | Mouse            | Invitrogen | 12-4714-81  | 1:100    |
| Isotype Control | BV786     | MOPC-21    | Mouse            | Biologend  | 400169      | 1:100    |
| Isotype Control | PE-Cy7    | MOPC-21    | Mouse            | Biologend  | 400126      | 1:100    |
| Isotype Control | APC-Cy7   | HTK888     | Armenian Hamster | Biologend  | 400927      | 1:100    |
| Isotype Control | APC       | eBR2a      | Rat              | Invitrogen | 17-4321-81  | 1:100    |

### In vitro Tph differentiation assay

| Antigen | Conjugate | Clone    | Source | Supplier  | Catalog. No | Dilution | Flow cytometry validation by the manufacturer |
|---------|-----------|----------|--------|-----------|-------------|----------|-----------------------------------------------|
| CD3     | PE-Cy5    | HIT3a    | Mouse  | Biologend | 300310      | 1:100    | Human PBMC                                    |
| CD4     | BV605     | OKT4     | Mouse  | Biologend | 317438      | 1:100    | Human PBMC                                    |
| CXCR5   | BV786     | J252D4   | Mouse  | Biologend | 356935      | 1:100    | Human PBMC                                    |
| PD1     | PE        | EH12.2H7 | Mouse  | Biologend | 329905      | 1:100    | Human PBMC                                    |
| CXCL13  | AF700     | NA       | Mouse  | R&D       | IC801N      | 1:100    | Human dendritic cells                         |
| IL-21   | APC       | 3A3-N2   |        | Biologend | 513007      | 1:100    | Human PBMC                                    |

| Antigen         | Conjugate | Clone      | Source | Supplier   | Catalog. No | Dilution |
|-----------------|-----------|------------|--------|------------|-------------|----------|
| Isotype Control | PE-Cy5    | MOPC-173   | Mouse  | Biologend  | 400217      | 1:100    |
| Isotype Control | BV605     | MPC-11     | Mouse  | Biologend  | 400349      | 1:100    |
| Isotype Control | BV786     | MOPC-21    | Mouse  | Biologend  | 400169      | 1:100    |
| Isotype Control | PE        | P3.6.2.8.1 | Mouse  | Invitrogen | 12-4714-81  | 1:100    |
| Isotype Control | AF700     | MOPC-21    | Mouse  | Biologend  | 400143      | 1:100    |
| Isotype Control | APC       | MOPC-21    | Mouse  | Biologend  | 400121      | 1:100    |
